# Supplementary material
Source: PubMed Central journal article supplement (PMC1693691)

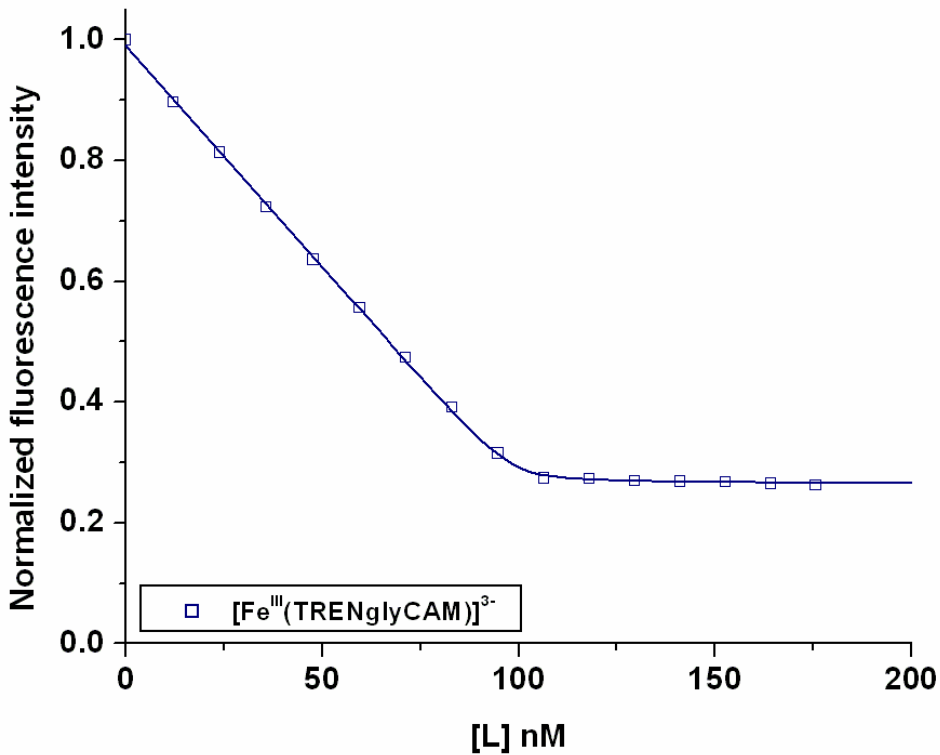

Supplement: pnas_0607055103_1.pdf [file pnas_0607055103_1.pdf]

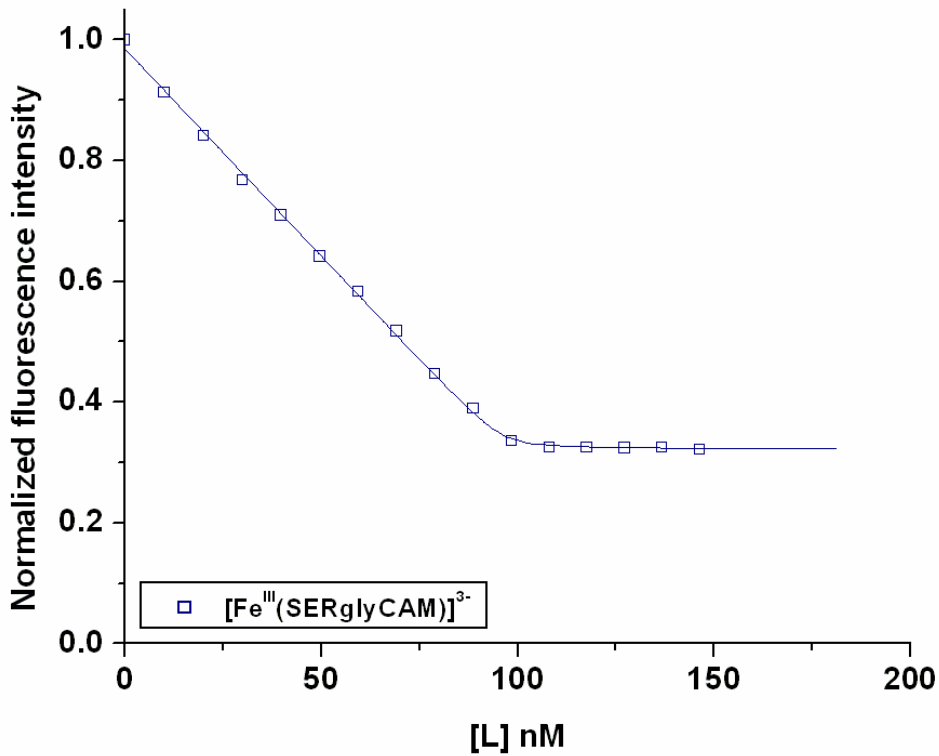

Supplement: pnas_0607055103_2.pdf [file pnas_0607055103_2.pdf]

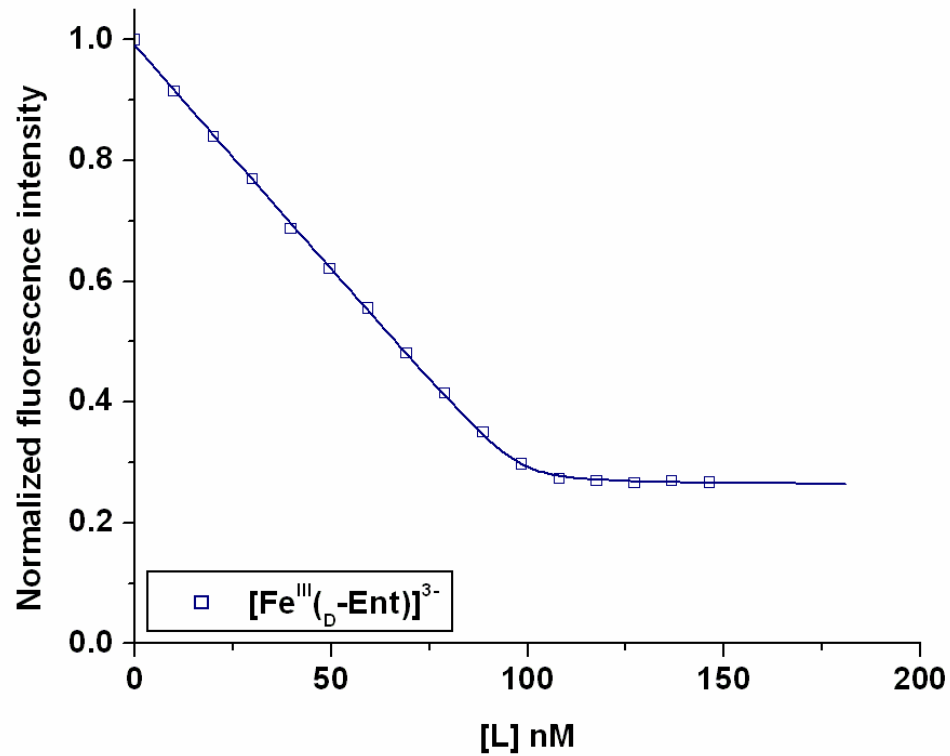

Supplement: pnas_0607055103_3.pdf [file pnas_0607055103_3.pdf]
